# Supplementary material for: Safety of the Salmonella enterica serotype Dublin strain Sdu189-derived live attenuated vaccine—A pilot study
Source: PubMed Central journal article supplement (PMC9554587; doi:10.3389/fvets.2022.986332), 2022-09-28
Supplement: Presentation_1.pdf [file Presentation_1.pdf]

## *Supplementary Material*

### 1 Supplementary Figures

(A)

Liver

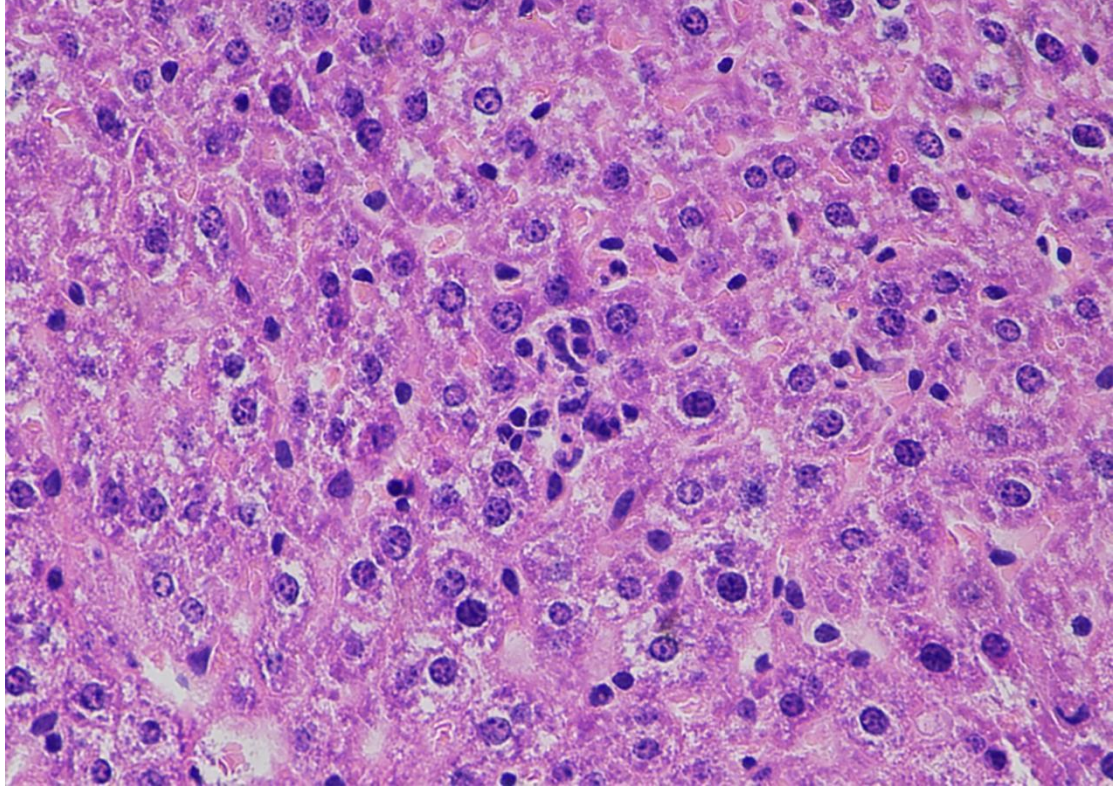

(B)

Spleen

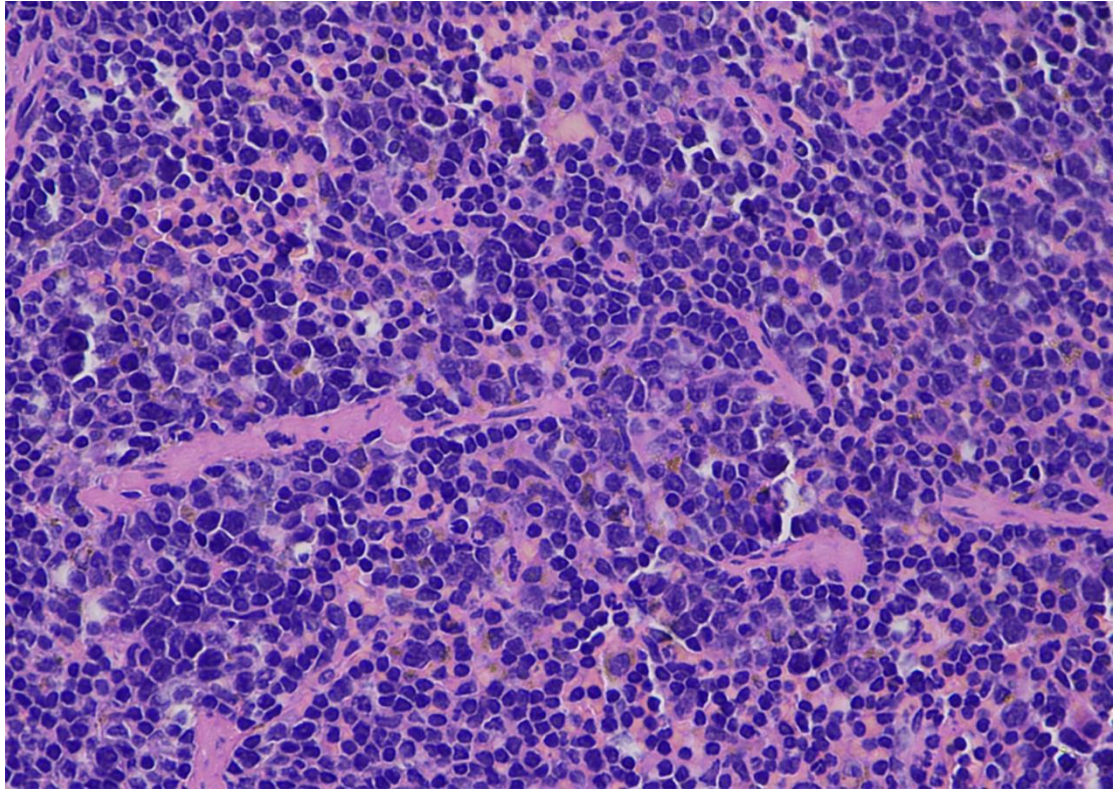

(C)  
Cecum

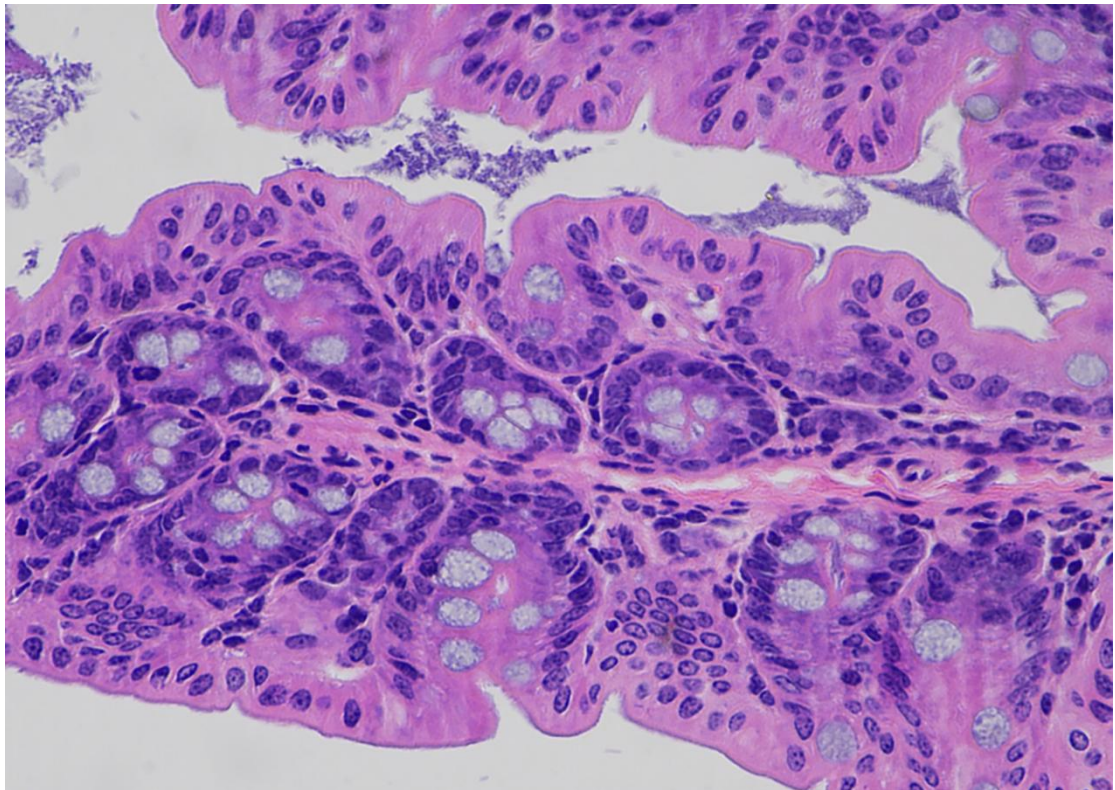

(D)  
Liver

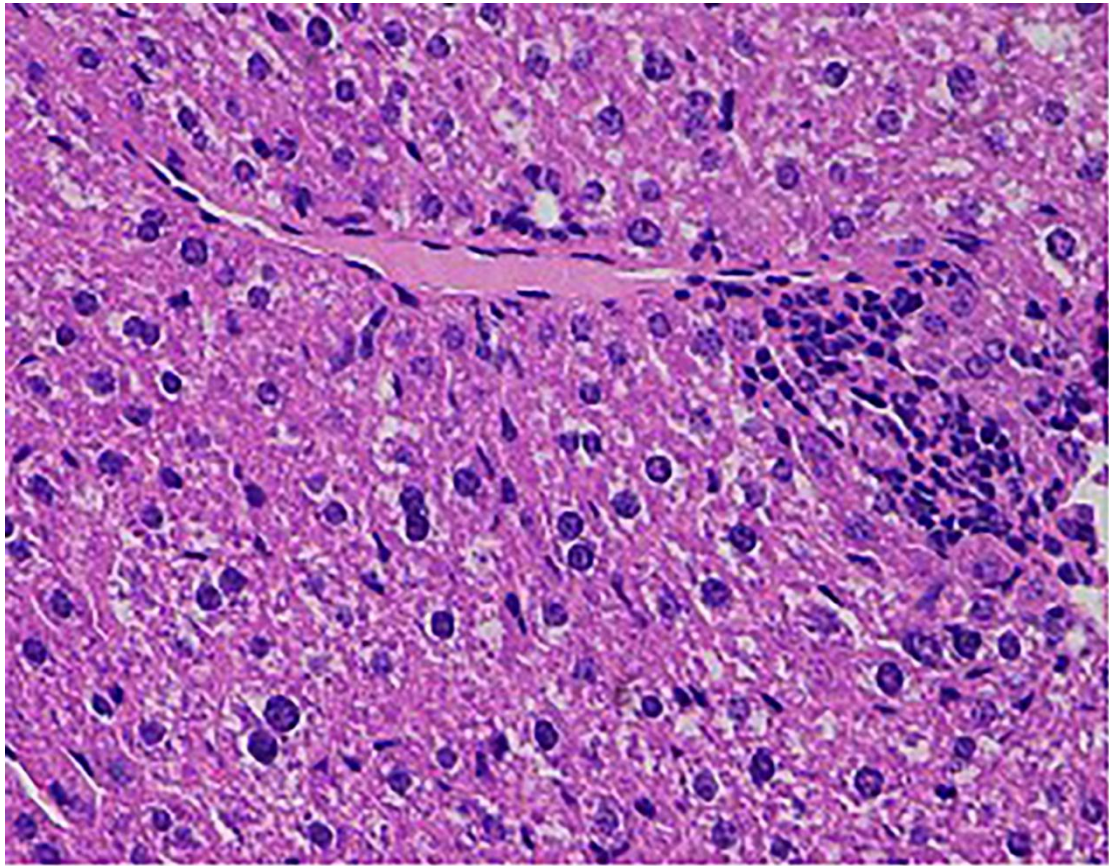

(E)  
Spleen

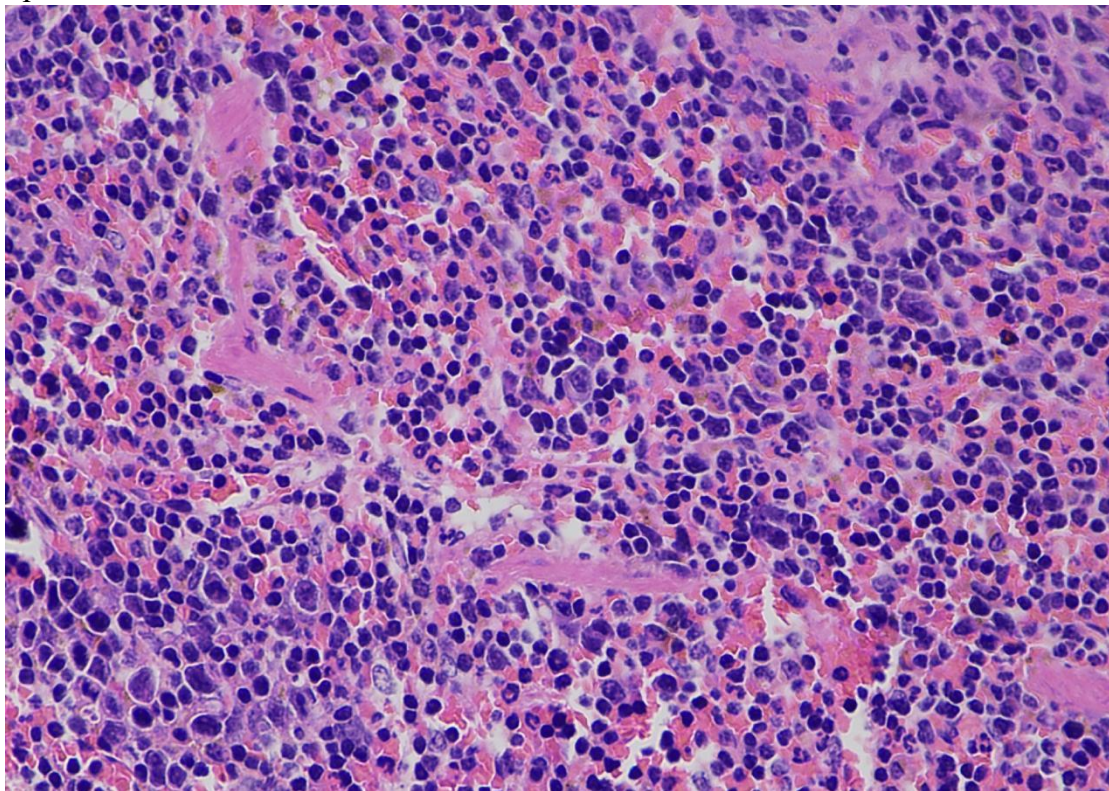

(F)  
Cecum

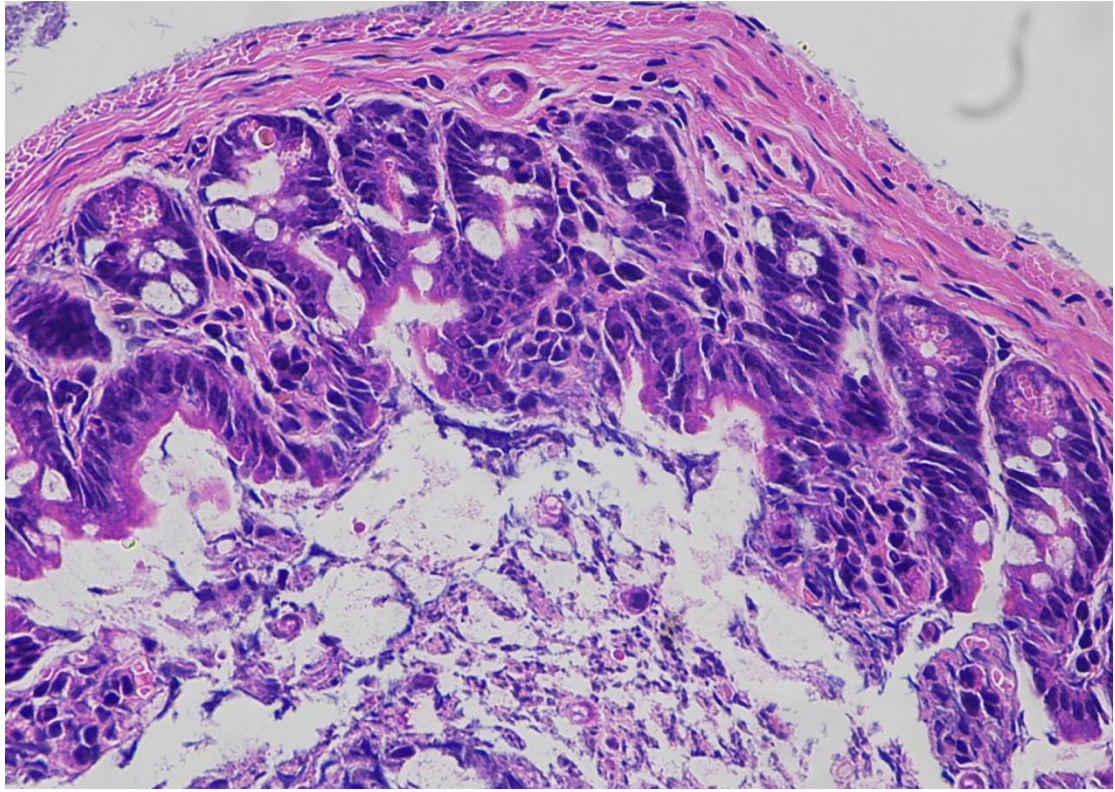

(G)  
Liver

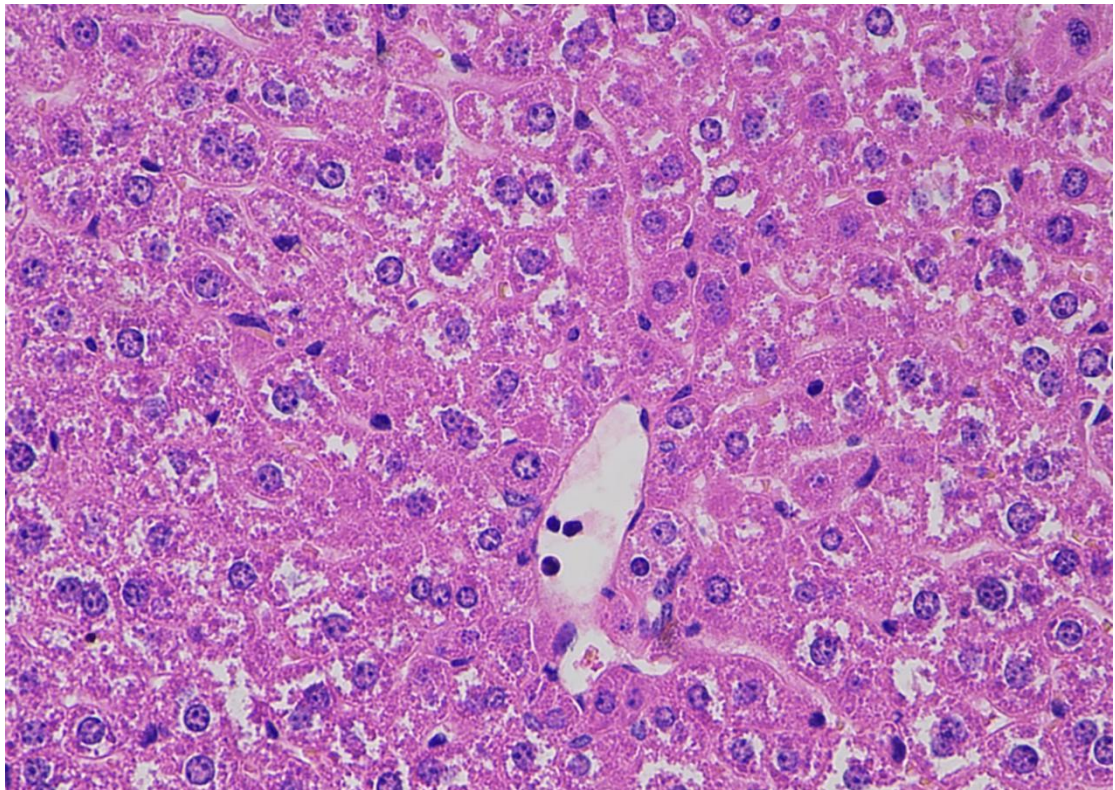

(H)  
Spleen

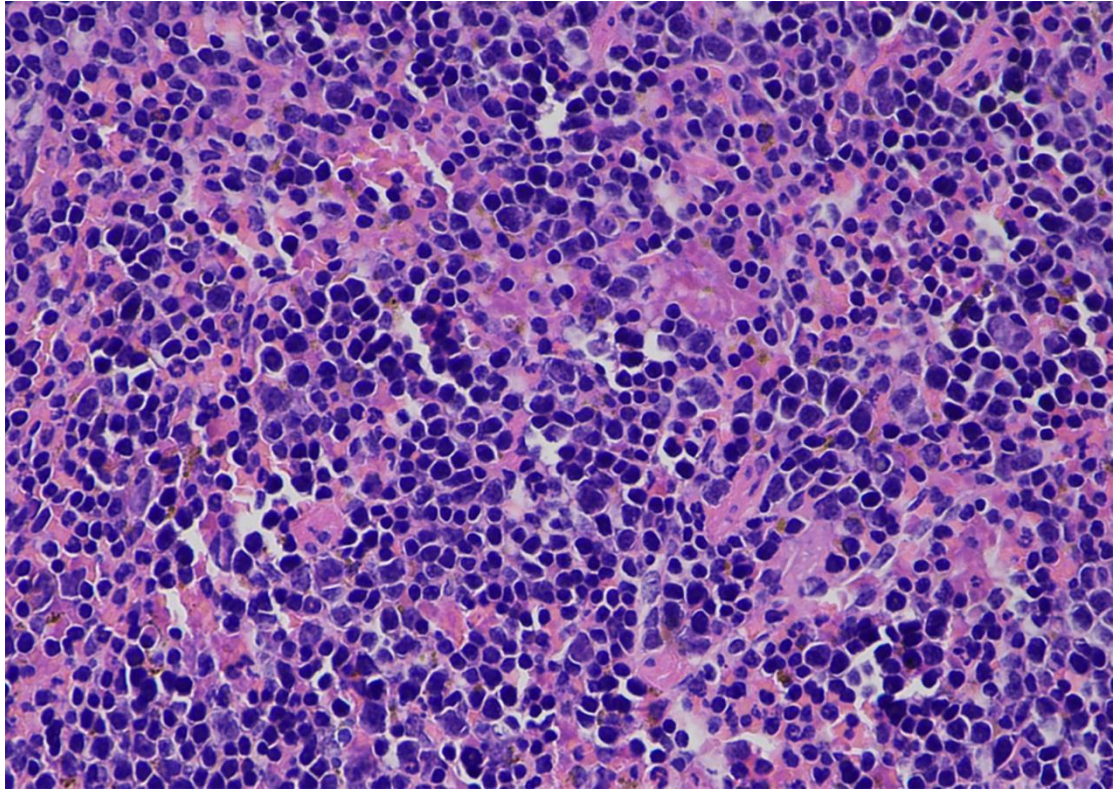

(I)  
Cecum

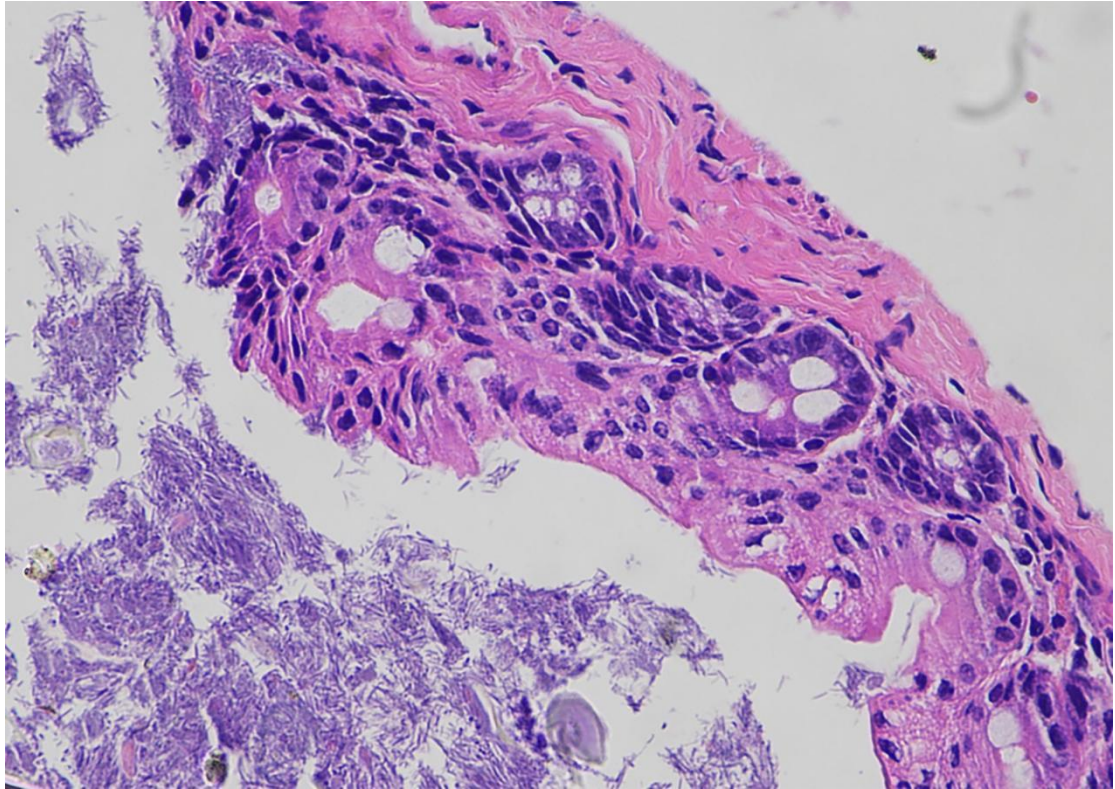

(J)  
Liver

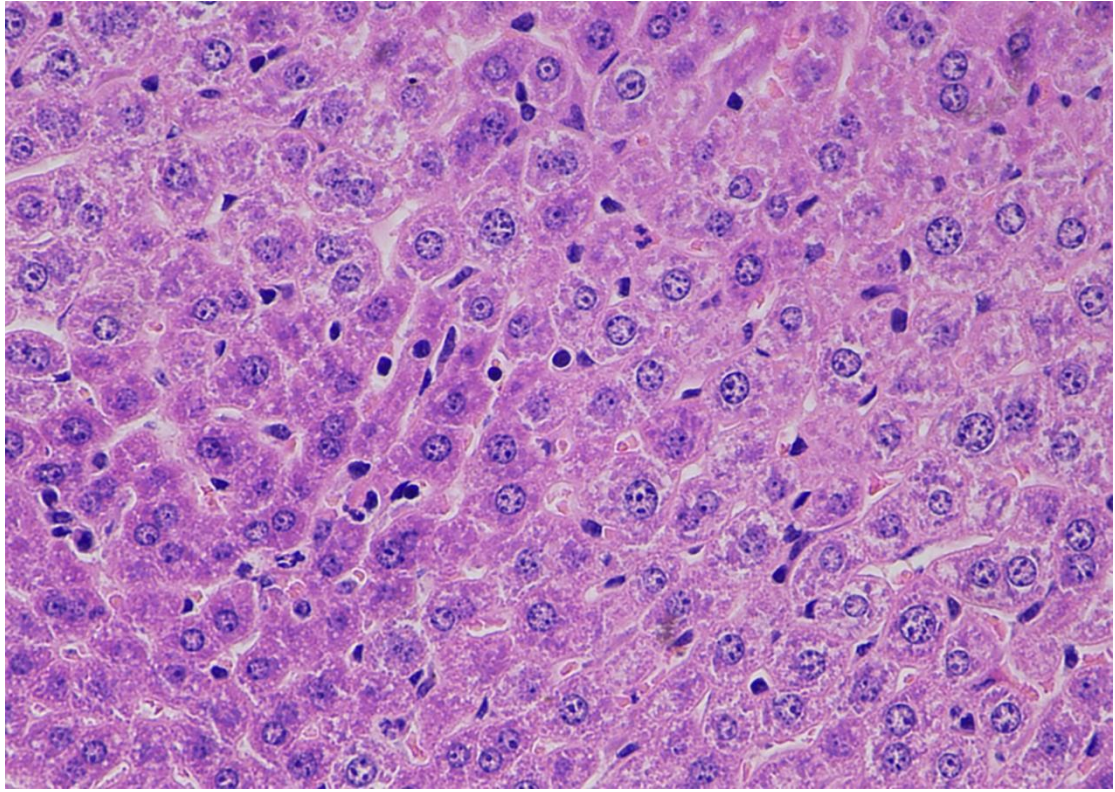

(K)  
Spleen

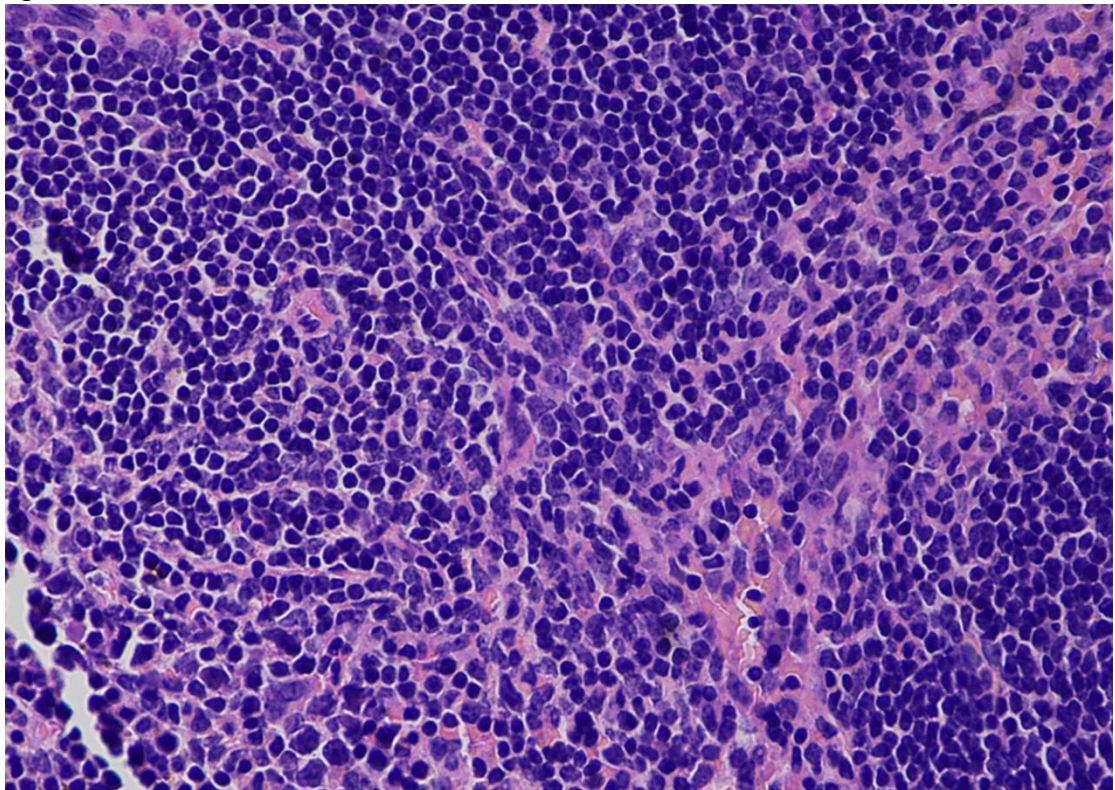

(L)  
Cecum

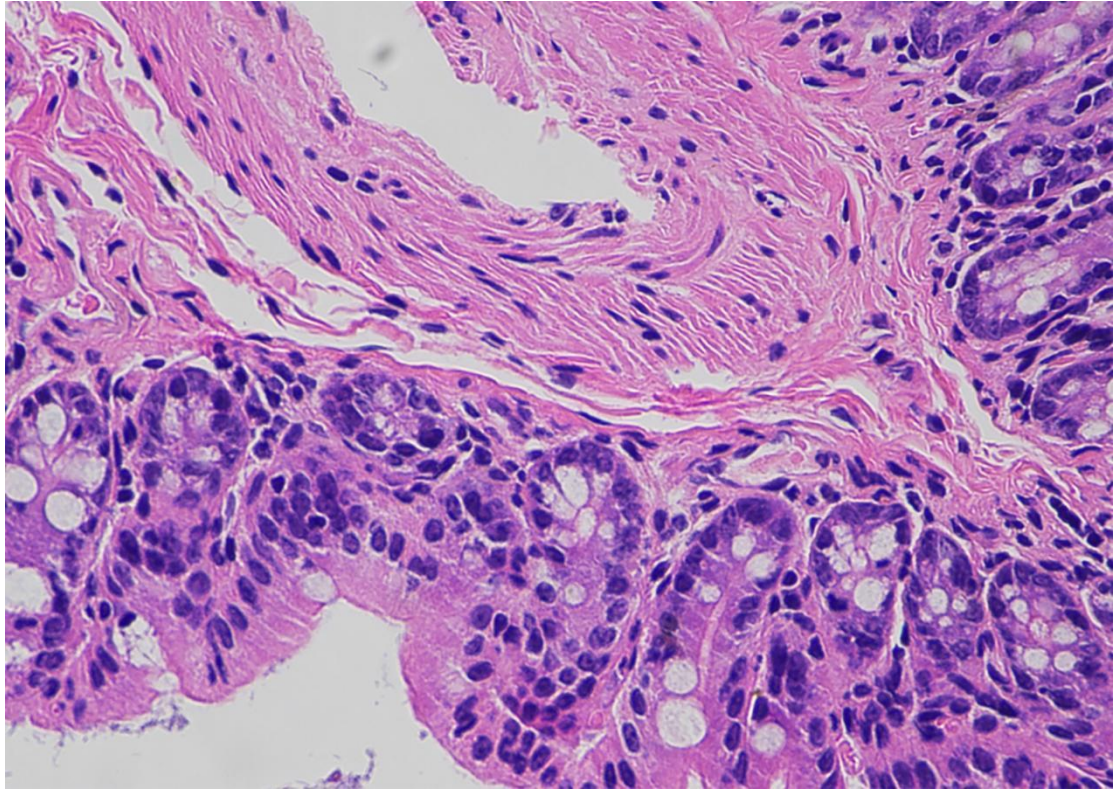

**Supplementary Figure 1.** Histological analysis after immunization. Representative images of haematoxylin and eosin-stained spleen, liver, and cecum tissue sections at 3 d post i.m. injection. (A), (B), and (C) are pathological sections of PBS group. (D), (E), and (F) are pathological sections of Sdu189 group. (G), (H), and (I) are pathological sections of Sdu189 $\Delta$ *spiC* group. (J), (K), and (L) are pathological sections of Sdu189 $\Delta$ *spiC* $\Delta$ *aroA* group (magnification is 400 $\times$ ).

(A)  
Liver

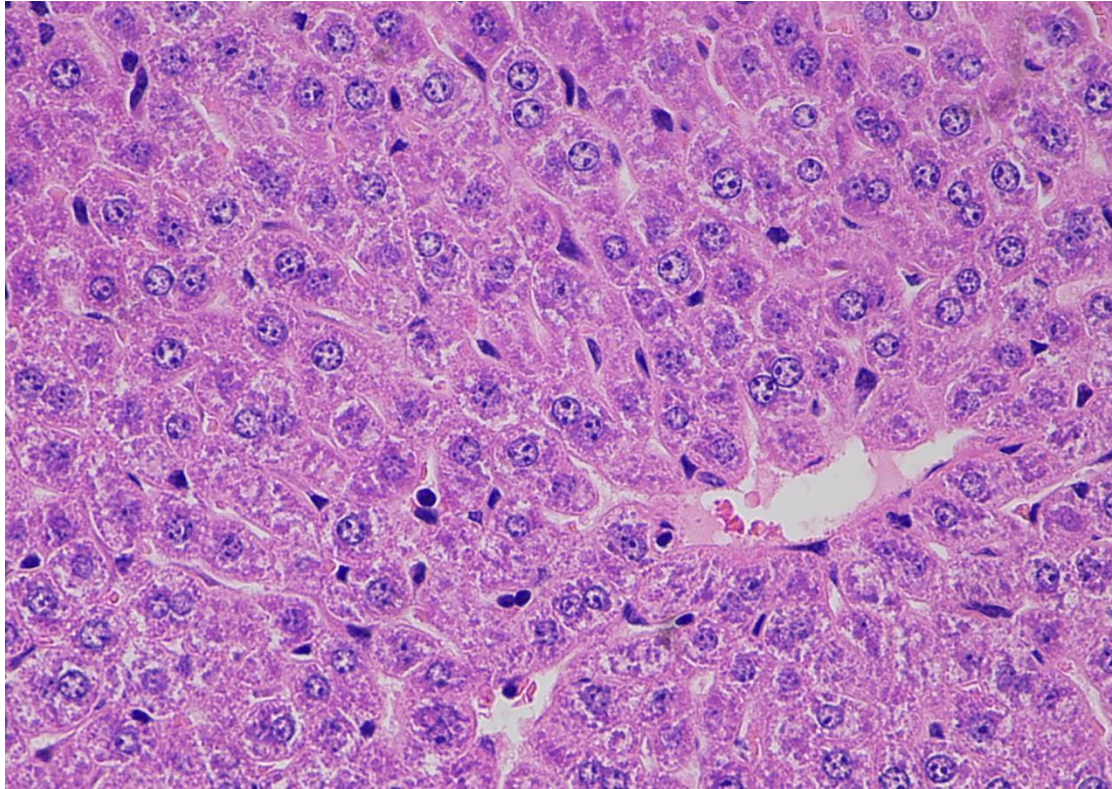

(B)  
Spleen

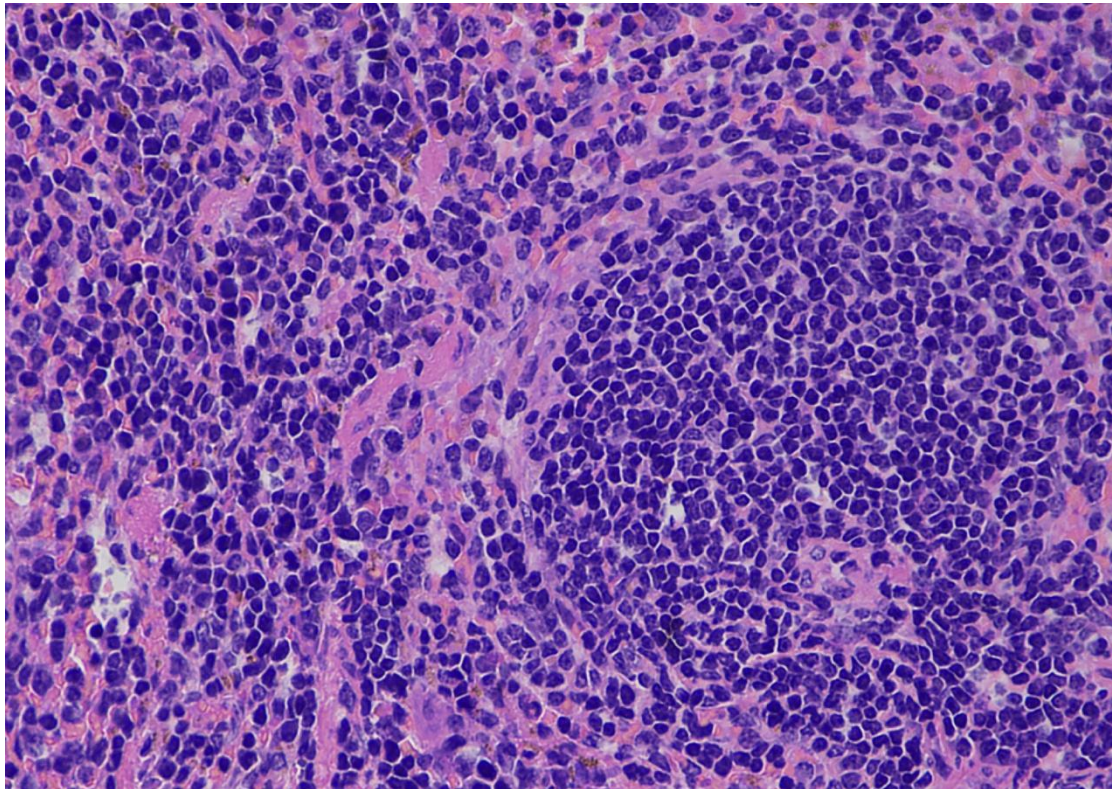

(C)  
Cecum



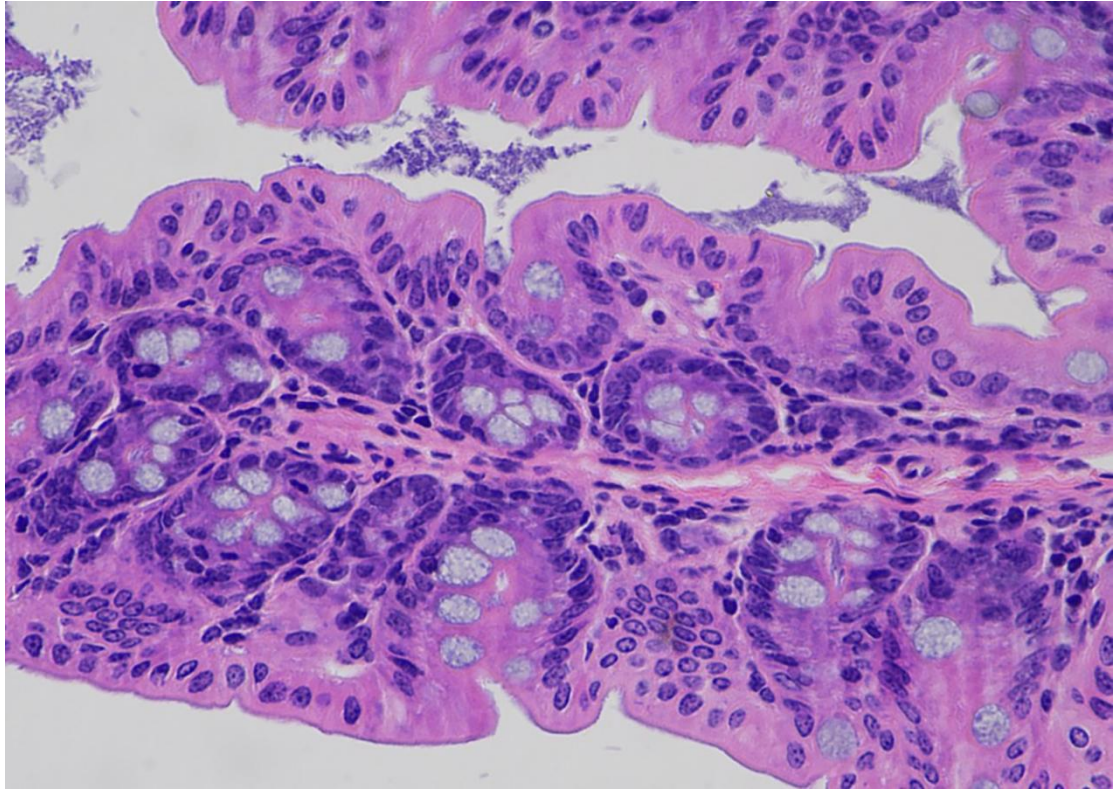

(D)  
Liver

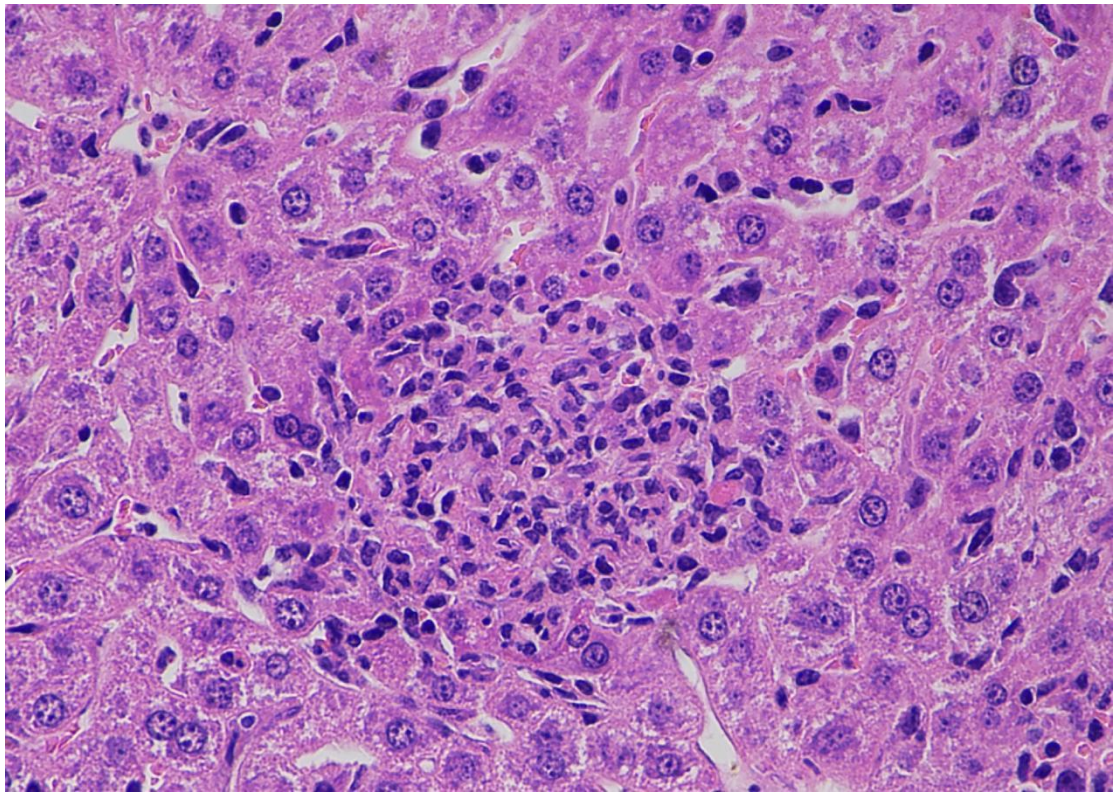

(E)  
Spleen

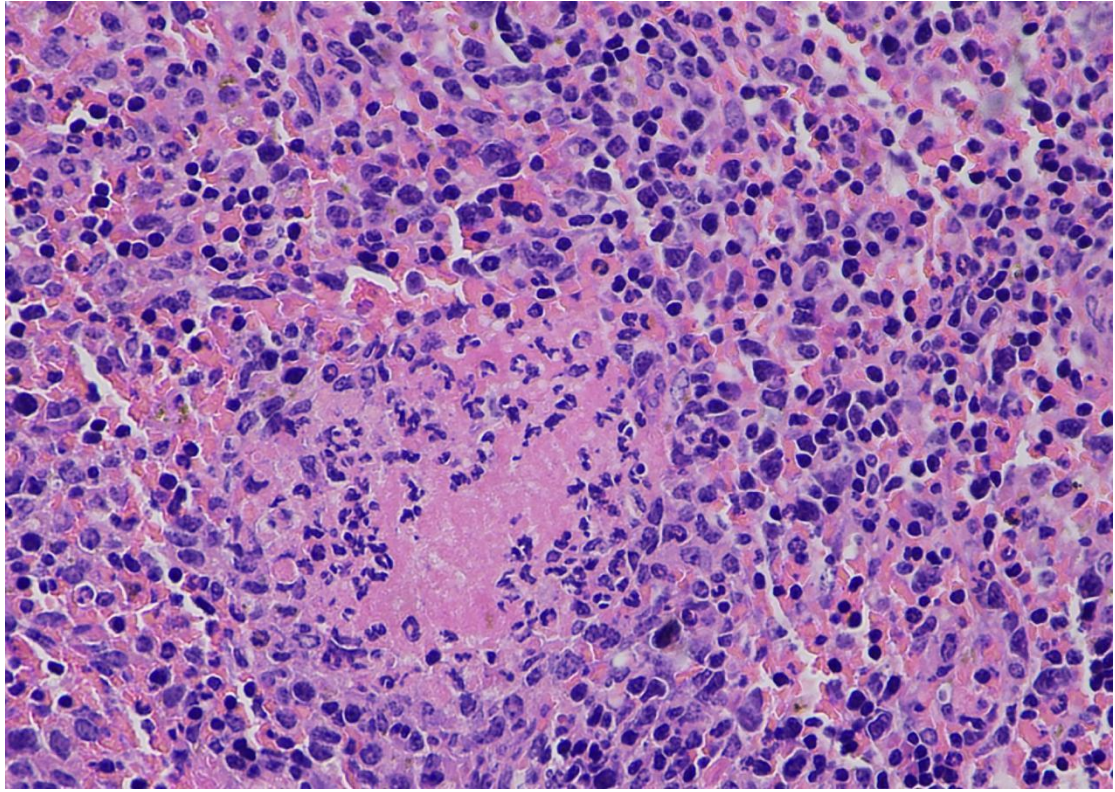

(F)  
Cecum

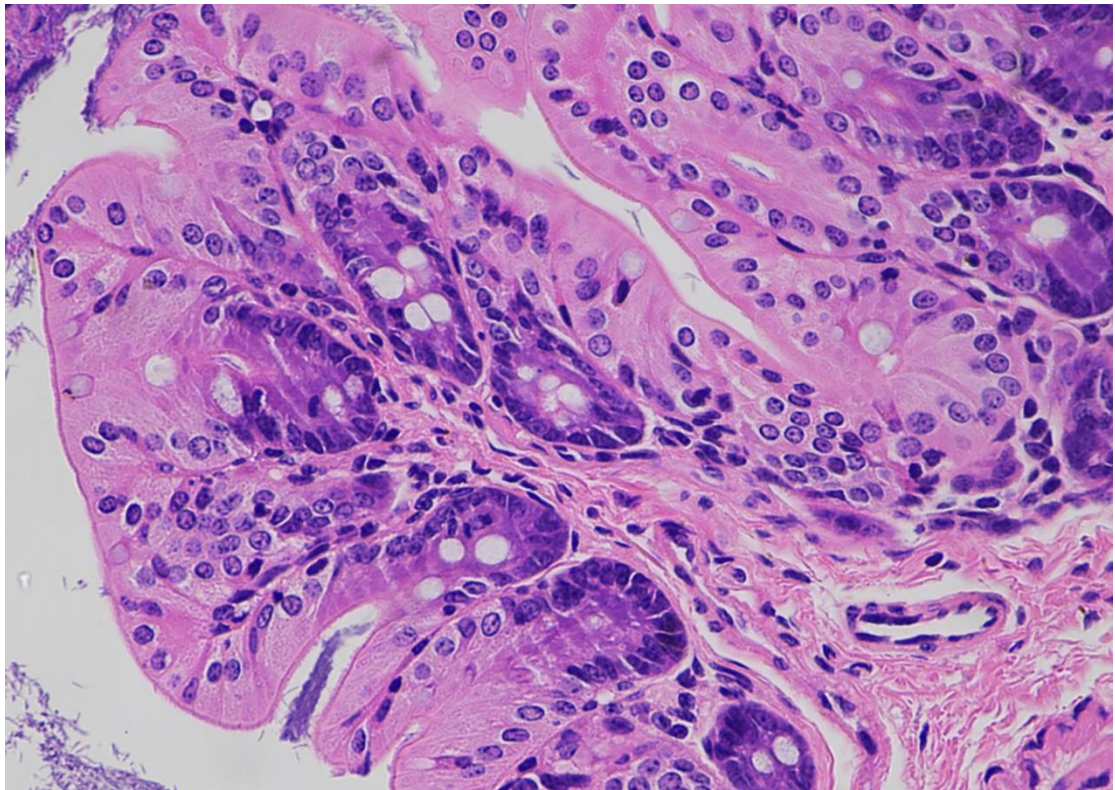

(G)  
Liver

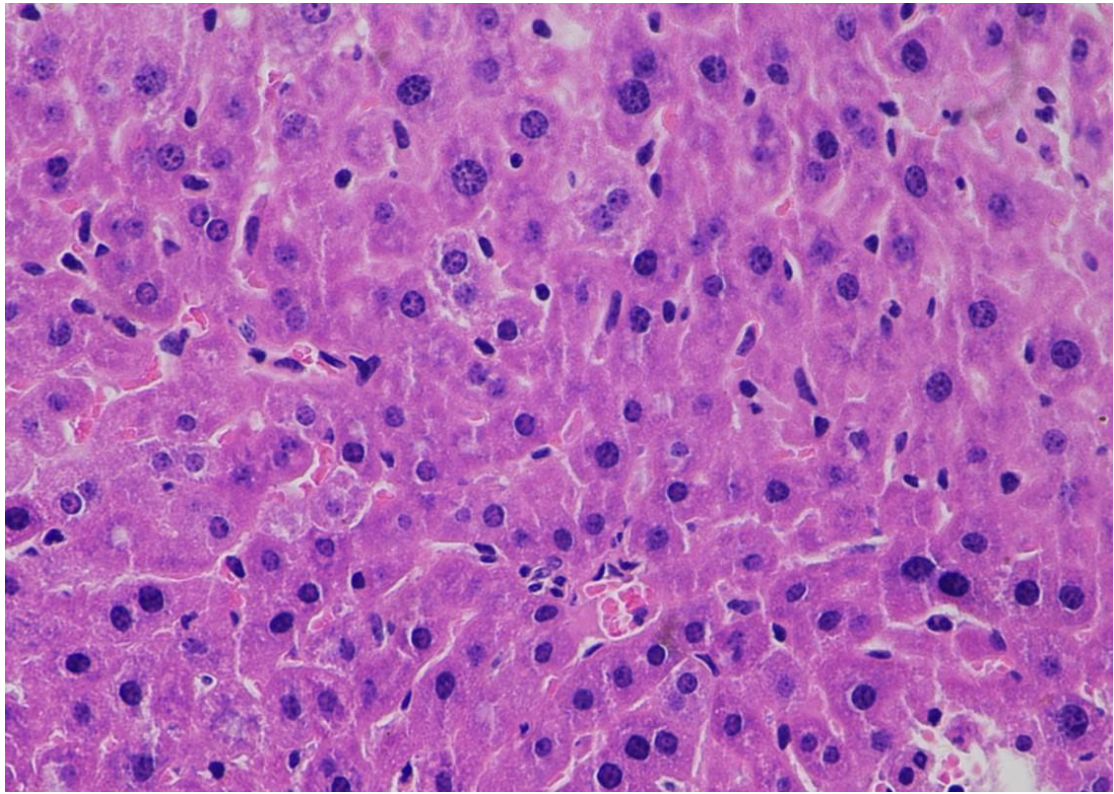

(H)  
Spleen

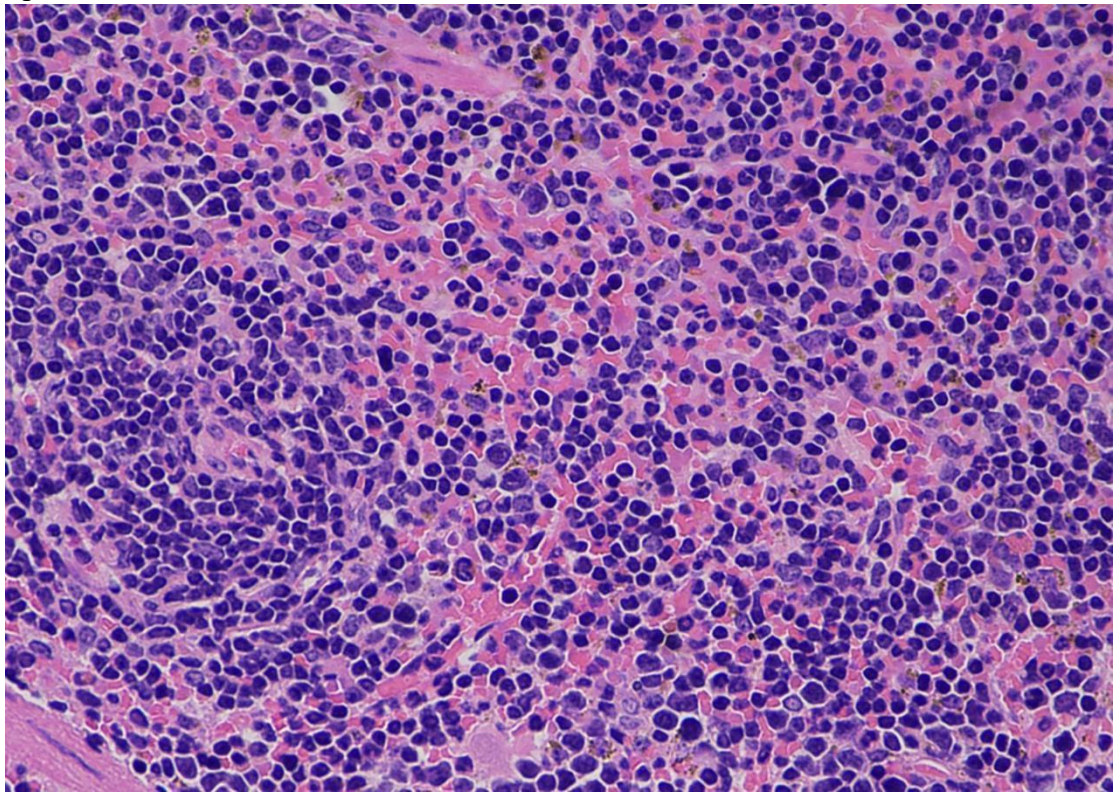

(I)  
Cecum

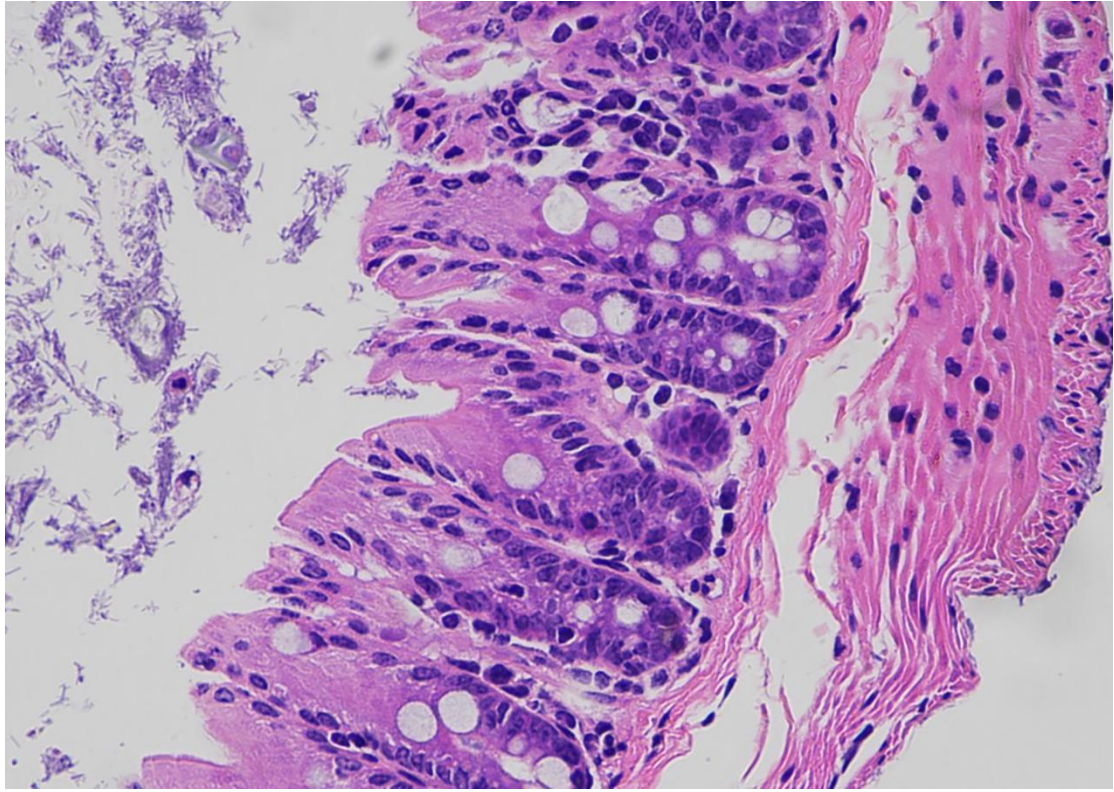

(J)  
Liver

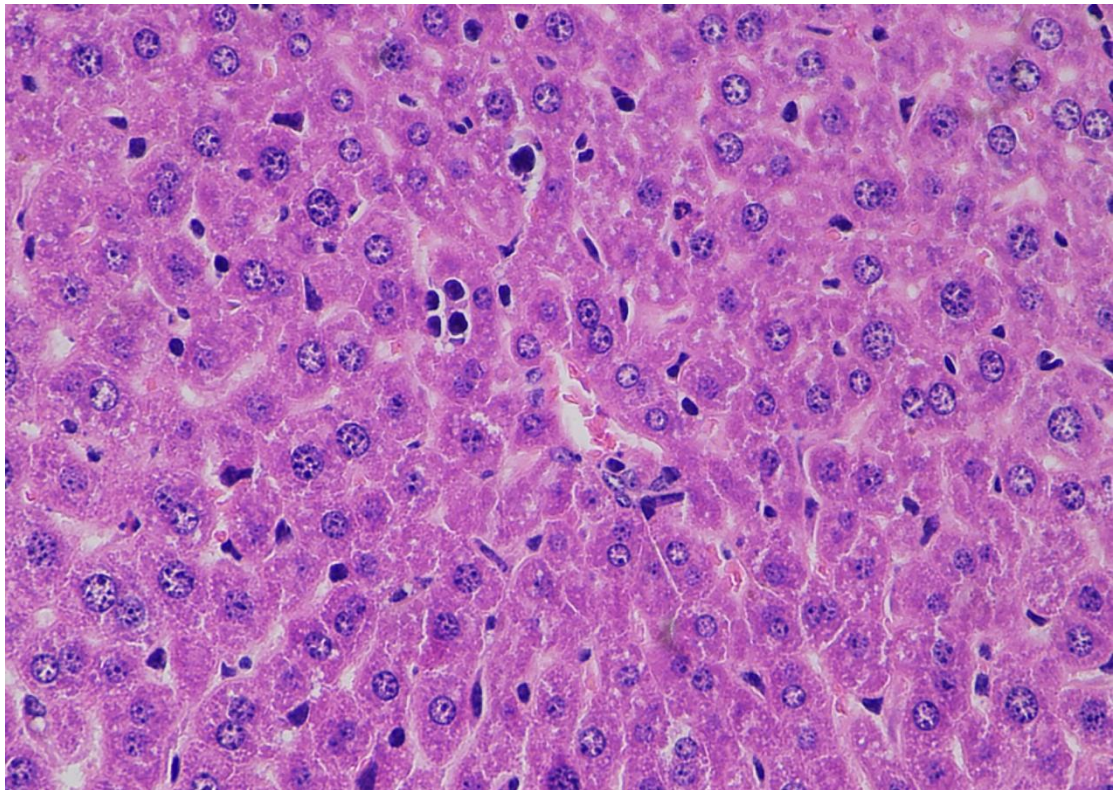

(K)  
Spleen

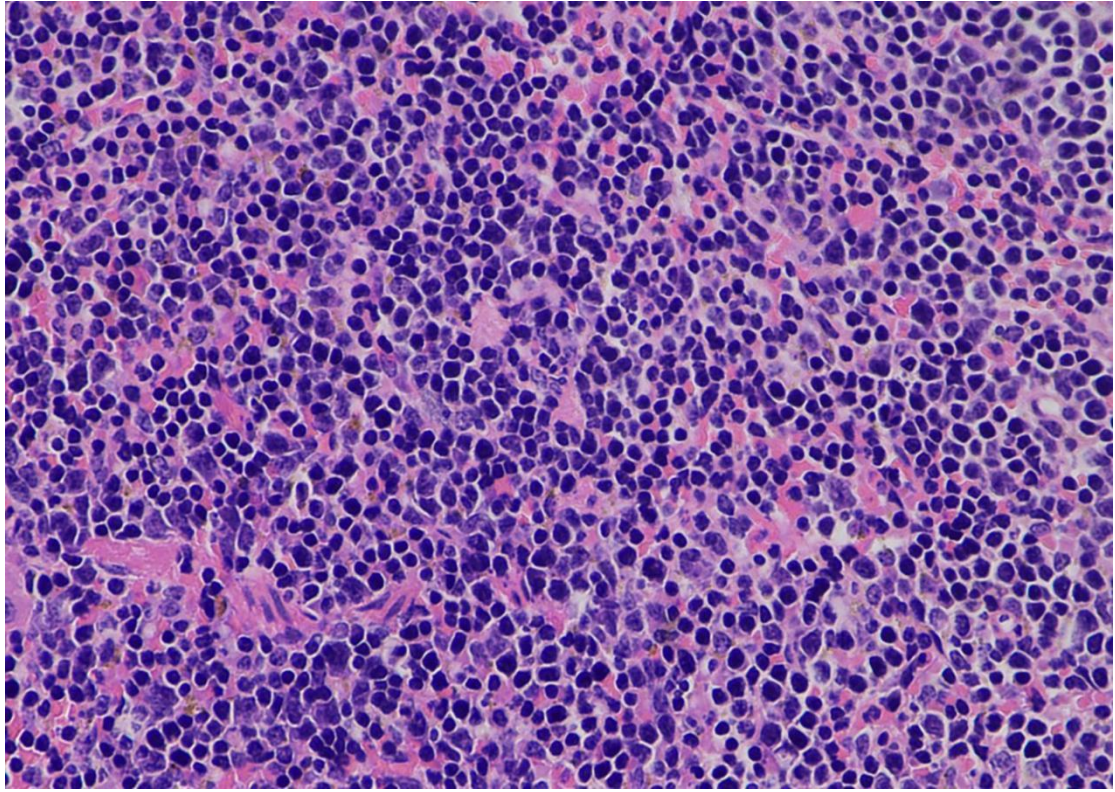

(L)  
Cecum

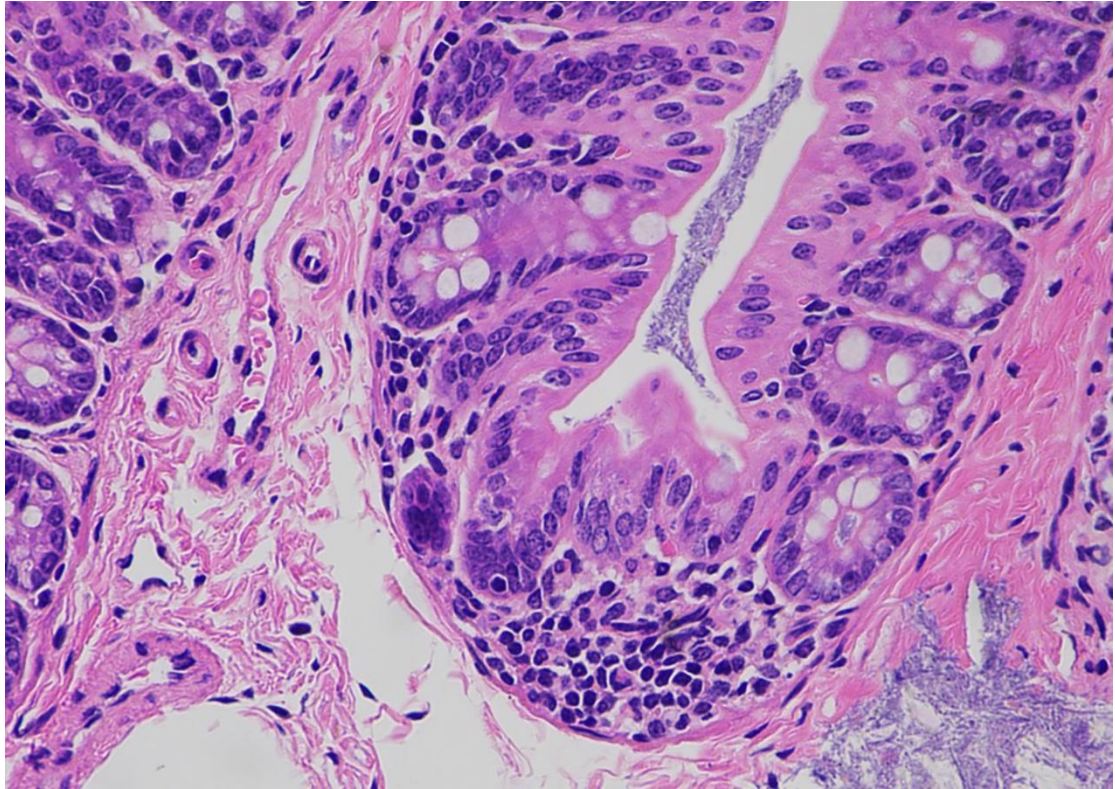

**Supplementary Figure 2.** Histological analysis after immunization. Representative images of haematoxylin and eosin-stained spleen, liver, and cecum tissue sections at 14 d post i.m. injection. (A), (B), and (C) are pathological sections of PBS group. (D),

(E), and (F) are pathological sections of Sdu189 group. (G), (H), and (I) are pathological sections of Sdu189 $\Delta$ *spiC* group. (J), (K), and (L) are pathological sections of Sdu189 $\Delta$ *spiC* $\Delta$ *aroA* group (magnification is 400 $\times$ ).
